# Supplementary material
Source: MDPI journal article supplement (https://www.mdpi.com/2227-7080/12/5/65)
Supplement: s1 [file s1]

Supplementary Material for

# Fluorine-Free Single-Component Polyelectrolyte of Poly(ethylene glycol) Bearing Lithium Methanesulfonylsulfonimide Terminal Groups: Effect of Structural Variance on Ionic Conductivity

Bungo Ochiai, Koki Hirabayashi, Yudai Fujii, and Yoshimasa Matsumura

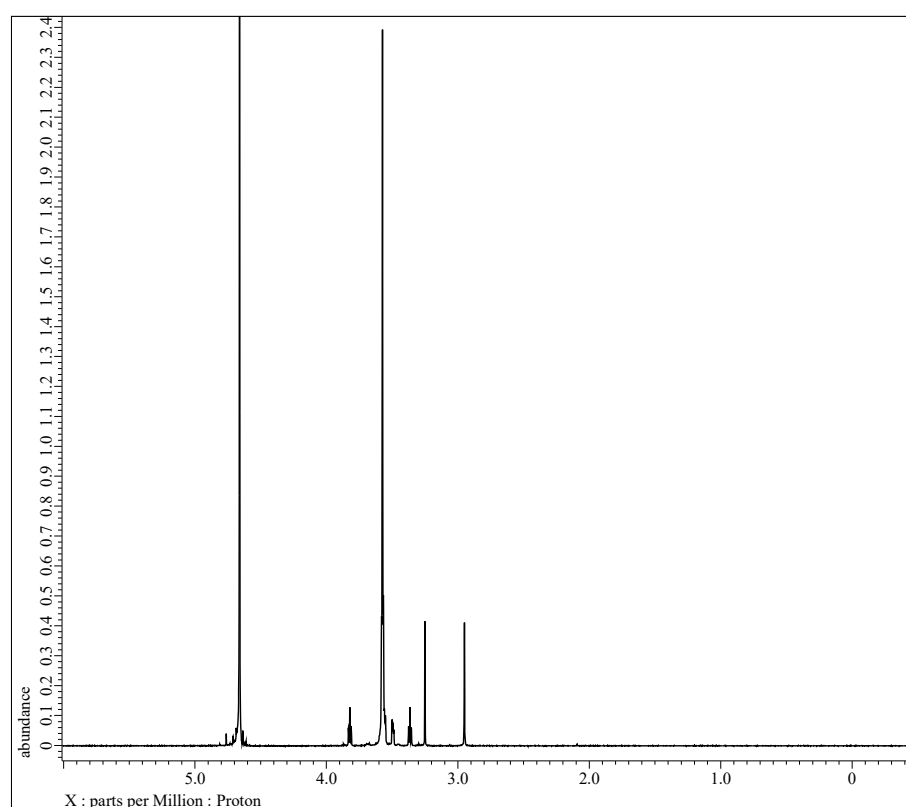

**Figure S1.**  $^1\text{H}$  NMR spectrum of PEG400MME-LiMSSI1.

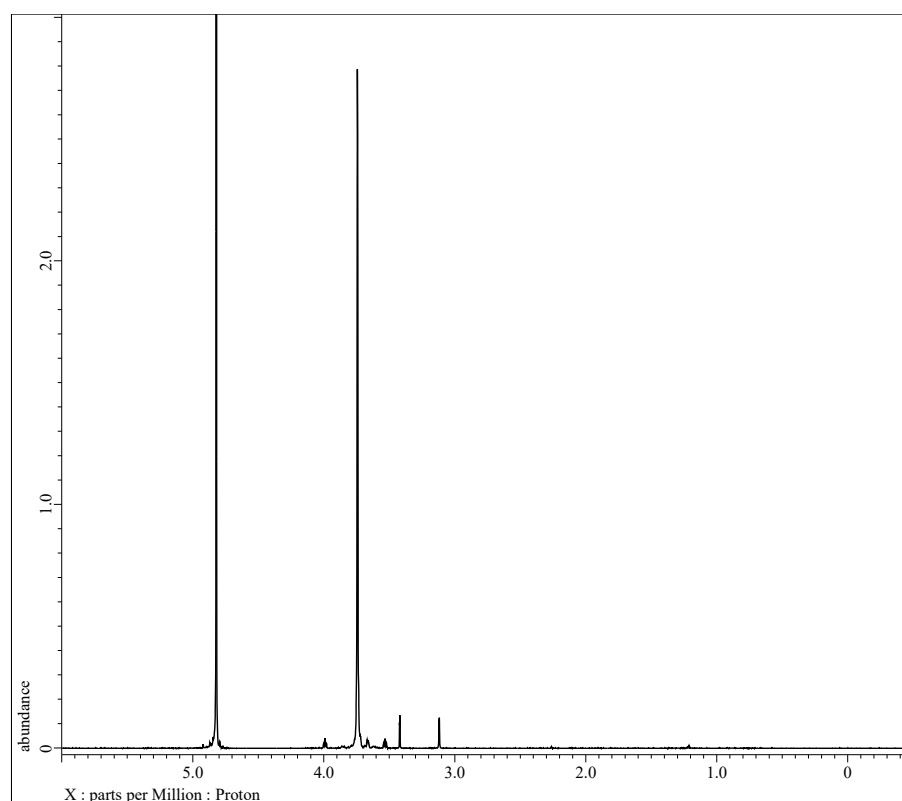

**Figure S2.**  $^1\text{H}$  NMR spectrum of PEG1000MME-LiMSSI1.

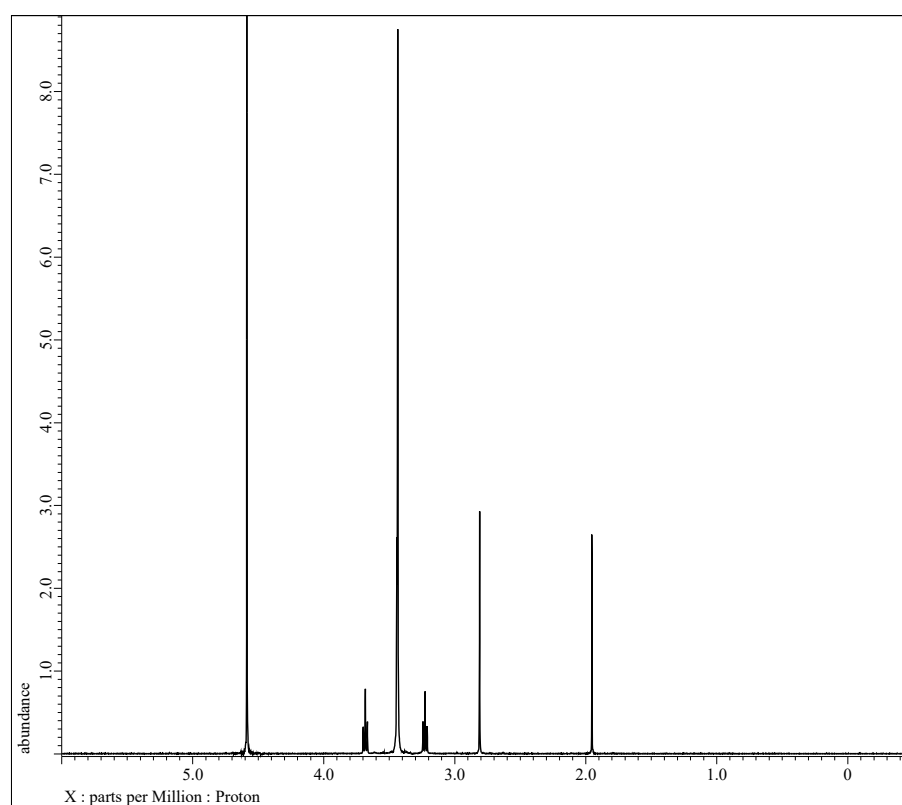

**Figure S3.**  $^1\text{H}$  NMR spectrum of PEG400-LiMSSI2.

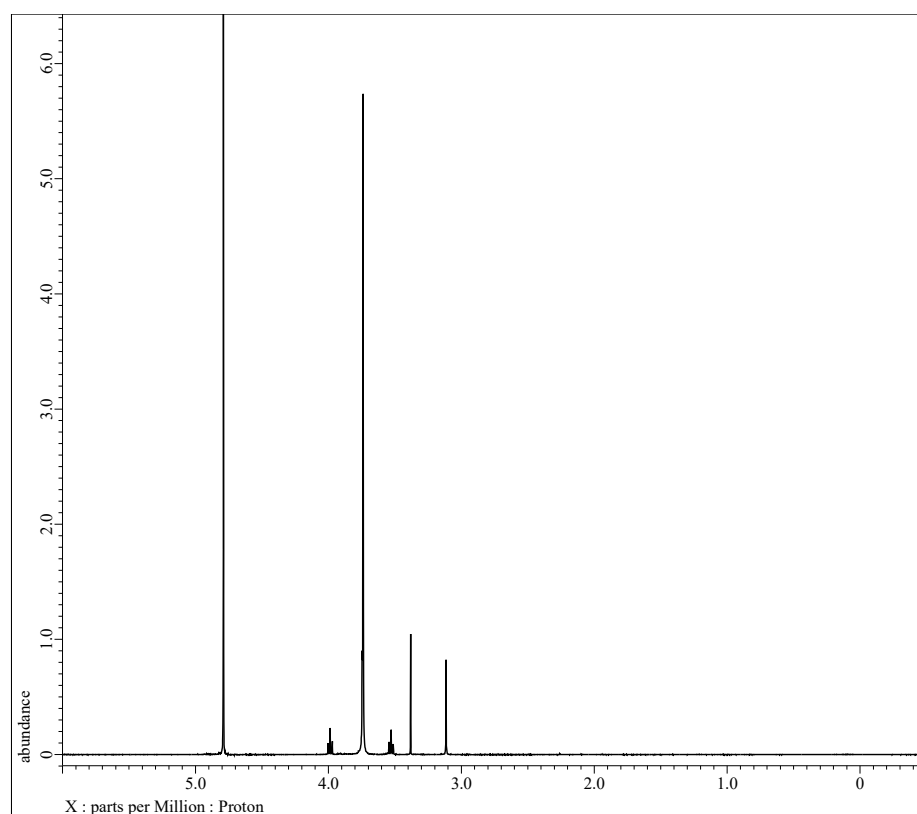

**Figure S4.**  $^1\text{H}$  NMR spectrum of PEG1000MME-LiMSSI2.

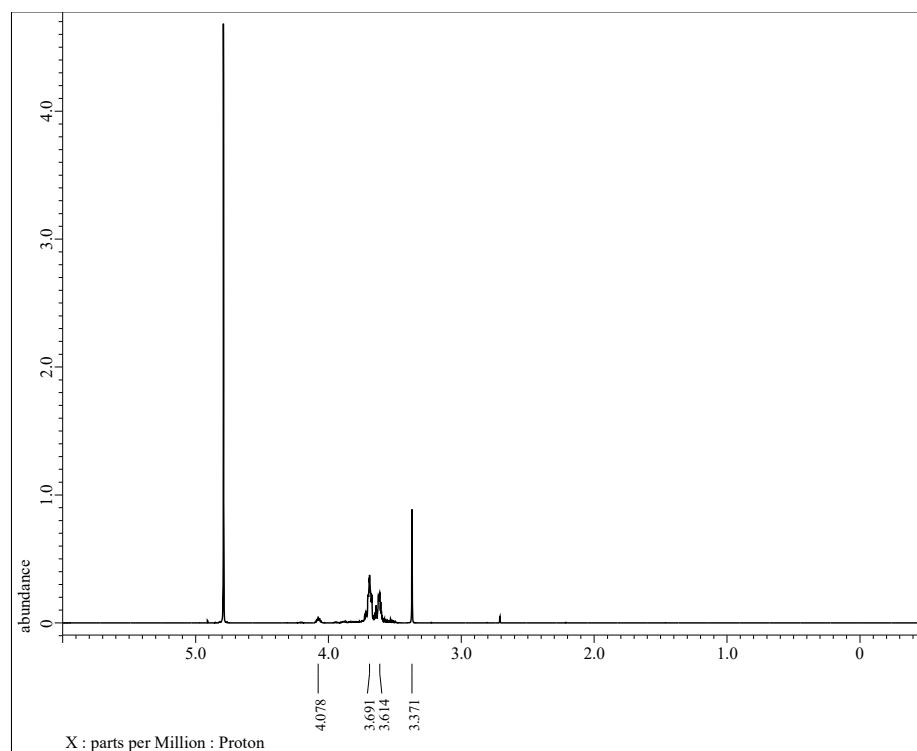

**Figure S5.**  $^1\text{H}$  NMR spectrum of DEGMME-LiMSSI2.

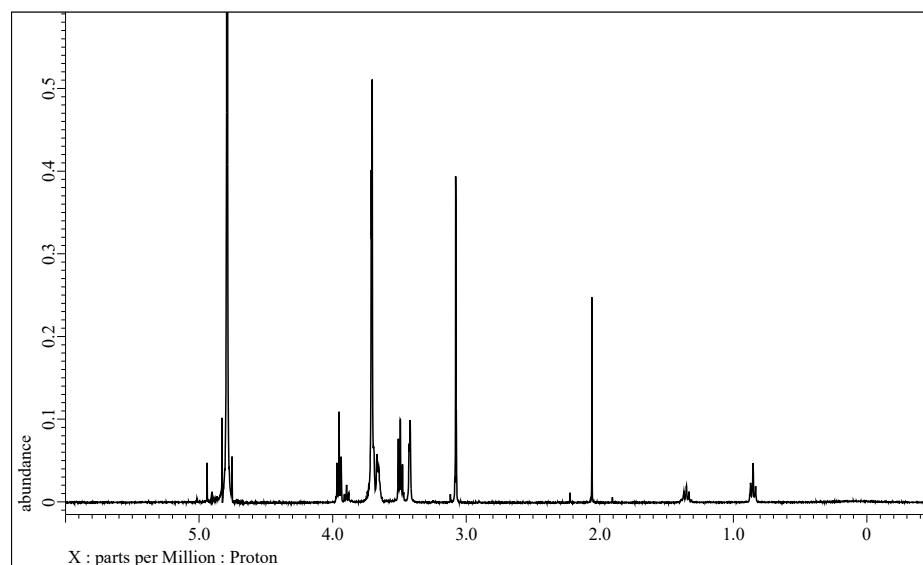

**Figure S6.**  $^1\text{H}$  NMR spectrum of TPME450-LiMSSI3.

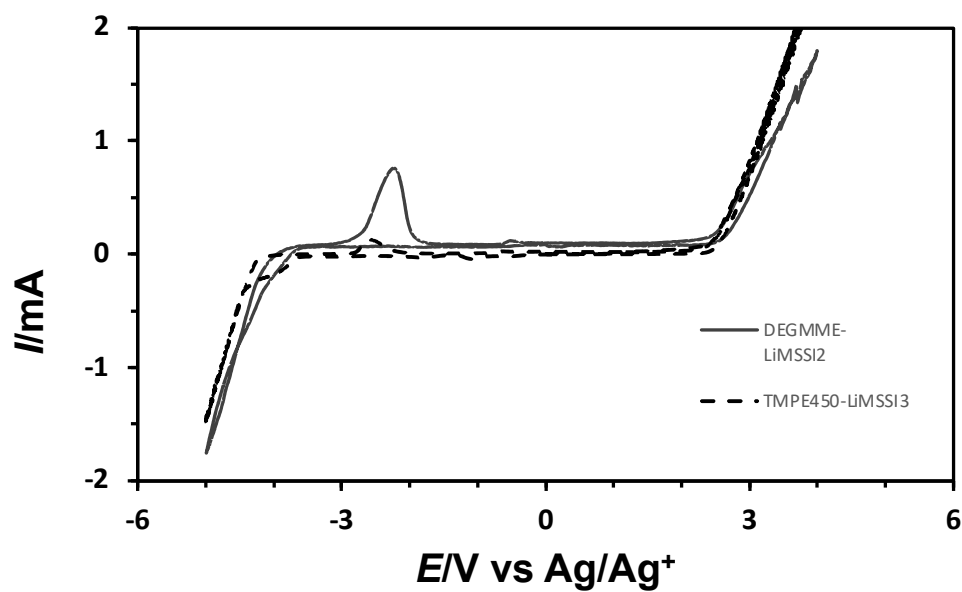

**Figure S7.** Cyclic voltammograms of DEGMME-LiMSSI2 (plain) and TPME450-LiMSSI3 (dashed) in 1.0 M EC/DEC (v/v = 3/7) solution of LiTFSI; reference electrode, Ag/Ag<sup>+</sup>; working electrode, Pt disk ( $\varphi$  = 1.6 mm); counter electrode, Pt wire ( $\varphi$  = 0.5 mm); sweep rate = 0.1 V/s).

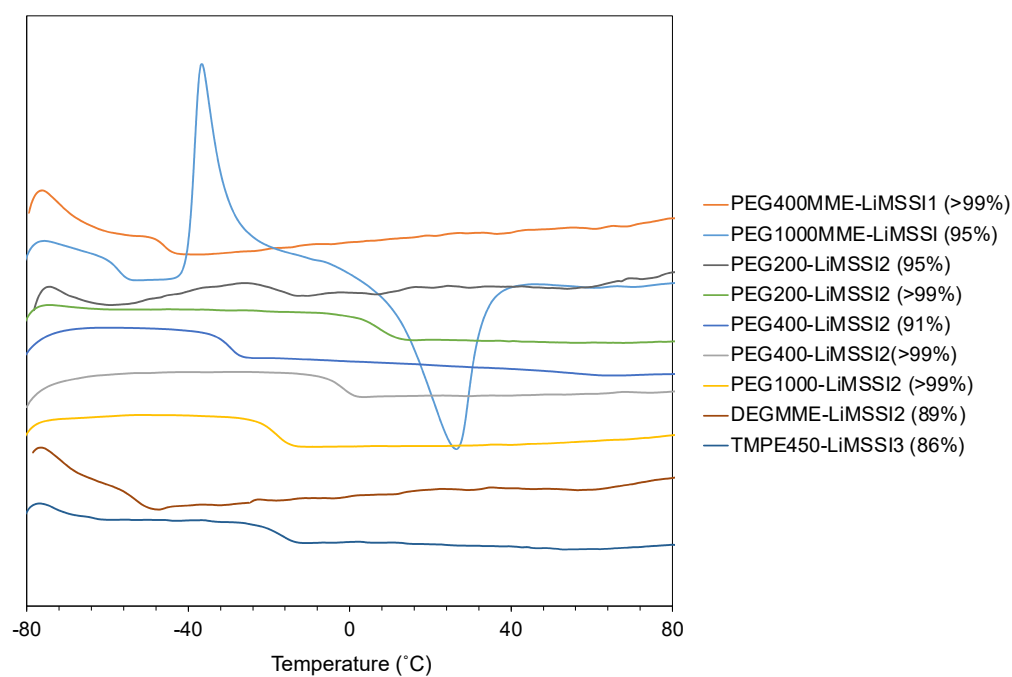

**Figure S8.** DSC curves of polyelectrolytes (10 °C/min, second heating scan, N<sub>2</sub>).

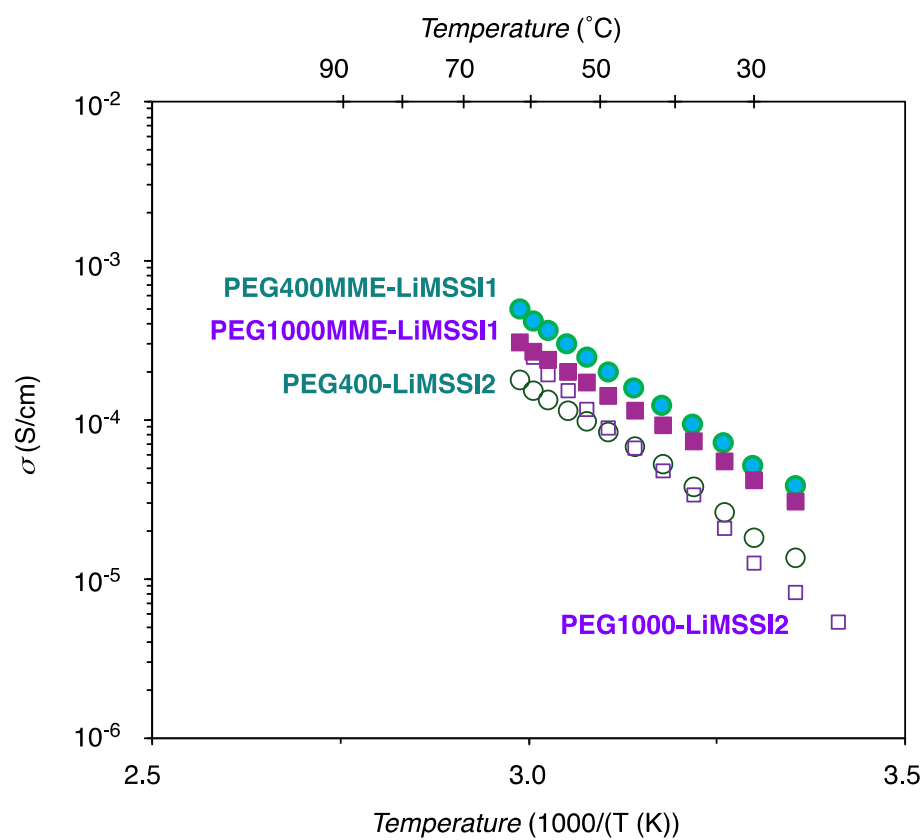

**Figure S9.** Ionic conductivity of PEG400-LiMSSI1 (green closed circle), PEG1000MME-LiMSSI1 (purple closed square), PEG400-LiMSSI2 (green open circle), and PEG1000-LiMSSI2 (purple open square) after drying at 90 °C for 2 h under a nitrogen atmosphere.
